# Supplementary material for: Removal of corallivorous snails as a proactive tool for the conservation of acroporid corals
Source: PeerJ. 2014 Nov 27;2:e680. doi: 10.7717/peerj.680 (PMC4250068; doi:10.7717/peerj.680)
Supplement: Supplemental Information 1 [file peerj-02-680-s001.xlsx]

## Sheet: Coordinates
Treatment	Site	Latitude	Longitude
Ap Only	Carysfort Reef	25.2218	-80.2106
All Hosts	Carysfort Reef	25.2229	-80.2096
Control	Carysfort Reef	25.2229	-80.21
Ap Only	Elbow Reef	25.1426	-80.2583
All Hosts	Elbow Reef	25.1429	-80.2582
Control	Elbow Reef	25.1439	-80.2578
Ap Only	French Reef	25.0339	-80.3494
All Hosts	French Reef	25.0337	-80.3496
Control	French Reef	25.0352	-80.349
Ap Only	Key Largo Dry Rocks	25.1236	-80.2974
All Hosts	Key Largo Dry Rocks	25.1226	-80.2983
Control	Key Largo Dry Rocks	25.1243	-80.2988
Ap Only	Molasses Reef	25.0096	-80.3748
All Hosts	Molasses Reef	25.0091	-80.3747
Control	Molasses Reef	25.0101	-80.3733
Ap Only	Sand Island	25.0183	-80.3686
All Hosts	Sand Island	25.0182	-80.3684
Control	Sand Island	25.0181	-80.3684

## Sheet: Counts
Treat	Treatment	Reef	Date	Survey	APAL-sn	APAL-col	SnPerAPAL	SnPerApLAI	PlotLAI	FS prev	SnLAILoss	DisPrev	OtherHost-sn	OtherHost-Col
Removal	Ap Only	Carysfort	2011-06-14	1	43	32	1.34375	5.09428	8.44084	0.5	0.208948	0
Removal	Ap Only	Elbow	2011-06-14	1	27	55	0.490909	1.77511	15.2103	0.166667	0.0254013	0.166667
Removal	Ap Only	French	2011-06-14	1	13	42	0.309524	1.34366	9.67509	0.166667	0.0131463	0.25
Removal	Ap Only	KLDR	2011-06-14	1	4	11	0.363636	2.4771	1.61479	0.142857	0.0230098	0
Removal	Ap Only	Molasses	2011-06-14	1	13	11	1.18182	5.10889	2.54458	0.222222	0.0327503	0.111111
Removal	Ap Only	Sand Island	2011-06-14	1	32	18	1.77778	11.3478	2.81993	0	0	0
Removal	All Hosts	Carysfort	2011-06-14	1	17	8	2.125	2.52951	6.72067	0.333333	0.0566955	0	61	3
Removal	All Hosts	Elbow	2011-06-14	1	20	28	0.714286	3.98025	5.02481	0.333333	0.0878974	0	10	2
Removal	All Hosts	French	2011-06-14	1	10	29	0.344828	7.30499	1.36893	0.25	0.0144575	0.0833333	39	6
Removal	All Hosts	KLDR	2011-06-14	1	2	22	0.0909091	3.72837	0.536427	0	0	0	19	2
Removal	All Hosts	Molasses	2011-06-14	1	38	29	1.31034	10.6676	3.56218	0.416667	0.146221	0	19	7
Removal	All Hosts	Sand Island	2011-06-14	1	60	41	1.46341	4.72743	12.6919	0.25	0.2438	0.0833333	9	1
Control	Control	Carysfort	2011-06-14	1	16	13	1.23077	17.0837	0.936566	0.266667	0.0502094	0	23	6
Control	Control	Elbow	2011-06-14	1	16	22	0.727273	3.80711	4.20266	0.454545	0.148951	0.181818	14	4
Control	Control	French	2011-06-14	1	8	24	0.333333	4.21999	1.89574	0.181818	0.00718399	0	29	15
Control	Control	KLDR	2011-06-14	1	11	10	1.1	3.72257	2.95495	0.125	0.004374	0	10	6
Control	Control	Molasses	2011-06-14	1	15	22	0.681818	1.71589	8.7418	0.333333	0.0707982	0	7	7
Control	Control	Sand Island	2011-06-14	1	4	10	0.4	4.97487	0.804041	0.0833333	0.0264253	0.0833333	10	6
Removal	Ap Only	Carysfort	2011-07-03	2	6	32	0.1875
Removal	Ap Only	Elbow	2011-07-03	2	7	55	0.127273
Removal	Ap Only	French	2011-07-03	2	2	42	0.047619
Removal	Ap Only	KLDR	2011-07-03	2	0	11	0
Removal	Ap Only	Molasses	2011-07-03	2	0	11	0
Removal	Ap Only	Sand Island	2011-07-03	2	3	18	0.166667
Removal	All Hosts	Carysfort	2011-07-03	2	2	8	0.25
Removal	All Hosts	Elbow	2011-07-03	2	8	28	0.285714
Removal	All Hosts	French	2011-07-03	2	1	29	0.0344828
Removal	All Hosts	KLDR	2011-07-03	2	0	22	0
Removal	All Hosts	Molasses	2011-07-03	2	6	29	0.206897
Removal	All Hosts	Sand Island	2011-07-03	2	5	41	0.121951
Removal	Ap Only	Carysfort	2011-09-15	3	2	22	0.0909091	0.233971	8.54806	0	0	0.666667	0	0
Removal	Ap Only	Elbow	2011-09-15	3	3	69	0.0434783	0.199632	15.0276	0	0	0.666667
Removal	Ap Only	French	2011-09-15	3	0	42	0	0	9.33369	0	0	0.333333
Removal	Ap Only	KLDR	2011-09-15	3	1	13	0.0769231	0.578777	1.72778	0	0	0.416667
Removal	Ap Only	Molasses	2011-09-15	3	3	9	0.333333	1.38697	2.16299	0.111111	0.0115282	0.777778
Removal	Ap Only	Sand Island	2011-09-15	3	1	20	0.05	0.336823	2.96892	0	0	0
Removal	All Hosts	Carysfort	2011-09-15	3	9	8	1.125	1.50406	5.98382	0.25	0.0544614	0.625	0	4
Removal	All Hosts	Elbow	2011-09-15	3	2	27	0.0740741	0.403307	4.959	0	0	0.333333	2	3
Removal	All Hosts	French	2011-09-15	3	0	32	0	0	1.56189	0	0	0	5	7
Removal	All Hosts	KLDR	2011-09-15	3	5	22	0.227273	6.8575	0.729128	0.0833333	0.02535	0	0	3
Removal	All Hosts	Molasses	2011-09-15	3	1	32	0.03125	0.282903	3.53478	0	0	0.333333	3	7
Removal	All Hosts	Sand Island	2011-09-15	3	12	41	0.292683	0.846222	14.1807	0.166667	0.0431324	0.25	0	2
Control	Control	Carysfort	2011-09-15	3	19	15	1.26667	18.9227	1.00408	0.133333	0.0203352	0.333333
Control	Control	Elbow	2011-09-15	3	19	20	0.95	4.78553	3.9703	0.454545	0.207918	0.454545
Control	Control	French	2011-09-15	3	8	28	0.285714	3.785	2.11361	0.0909091	0.005184	0
Control	Control	KLDR	2011-09-15	3	7	10	0.7	2.00648	3.4887	0.1	0.00141834	0
Control	Control	Molasses	2011-09-15	3	7	21	0.333333	0.813898	8.60059	0.25	0.0602629	0.333333
Control	Control	Sand Island	2011-09-15	3	1	12	0.0833333	1.186	0.843173	0.0909091	0.000225	0.0909091
Removal	Ap Only	Carysfort	2012-01-12	4	15	22	0.681818			0.272727	0.0558076	0	0	0
Removal	Ap Only	Elbow	2012-01-12	4	6	69	0.0869565			0	0	0	0	0
Removal	Ap Only	French	2012-01-12	4	1	42	0.0238095			0	0	0	0	0
Removal	Ap Only	KLDR	2012-01-12	4	0	13	0			0	0	0.1	0	0
Removal	Ap Only	Molasses	2012-01-12	4	1	9	0.111111			0.125	0.00202872	0.125	0	0
Removal	Ap Only	Sand Island	2012-01-12	4	5	20	0.25			0	0	0	0	0
Removal	All Hosts	Carysfort	2012-01-12	4	0	8	0			0	0	0.25	0	4
Removal	All Hosts	Elbow	2012-01-12	4	1	27	0.037037			0	0	0	2	3
Removal	All Hosts	French	2012-01-12	4	2	32	0.0625			0	0	0	1	7
Removal	All Hosts	KLDR	2012-01-12	4	2	22	0.0909091			0	0	0.0833333	0	3
Removal	All Hosts	Molasses	2012-01-12	4	6	32	0.1875			0	0	0	8	7
Removal	All Hosts	Sand Island	2012-01-12	4	3	37	0.0810811			0.0833333	0.0645159	0	1	2
Control	Control	Carysfort	2012-01-12	4	18	15	1.2			0.2	0.0295217	0	20	5
Control	Control	Elbow	2012-01-12	4	23	20	1.15			0.4	0.134964	0	15	4
Control	Control	French	2012-01-12	4	7	28	0.25			0.0909091	0.0130929	0	32	15
Control	Control	KLDR	2012-01-12	4	11	10	1.1			0.1	0.00126075	0	15	2
Control	Control	Molasses	2012-01-12	4	14	21	0.666667			0.25	0.13377	0.0833333	8	7
Control	Control	Sand Island	2012-01-12	4	0	12	0			0	0	0.1	13	6
Removal	Ap Only	Carysfort	2012-05-08	5	7	39	0.179487			0.0909091	0.00986133	0.0909091	0	0
Removal	Ap Only	Elbow	2012-05-08	5	3	113	0.0265487			0	0	0.272727	0	0
Removal	Ap Only	French	2012-05-08	5	4	43	0.0930233			0	0	0.2	0	0
Removal	Ap Only	KLDR	2012-05-08	5	0	25	0			0	0	0	0	0
Removal	Ap Only	Molasses	2012-05-08	5	3	11	0.272727			0.142857	0.0588612	0	0	0
Removal	Ap Only	Sand Island	2012-05-08	5	6	21	0.285714			0	0	0	0	0
Removal	All Hosts	Carysfort	2012-05-08	5	1	40	0.025			0	0	0.125	0	4
Removal	All Hosts	Elbow	2012-05-08	5	2	38	0.0526316			0	0	0	1	3
Removal	All Hosts	French	2012-05-08	5	3	36	0.0833333			0	0	0	0	7
Removal	All Hosts	KLDR	2012-05-08	5	0	26	0			0	0	0	4	3
Removal	All Hosts	Molasses	2012-05-08	5	1	36	0.0277778			0	0	0	4	7
Removal	All Hosts	Sand Island	2012-05-08	5	10	38	0.263158			0	0	0	3	2
Control	Control	Carysfort	2012-05-08	5	10	15	0.666667			0.2	0.0946615	0.0666667	1	5
Control	Control	Elbow	2012-05-08	5	16	54	0.296296			0.3	0.0467485	0.2	16	4
Control	Control	French	2012-05-08	5	6	31	0.193548			0.181818	0.0045338	0	6	15
Control	Control	KLDR	2012-05-08	5	13	22	0.590909			0.125	0.00498789	0.125	10	2
Control	Control	Molasses	2012-05-08	5	16	21	0.761905			0.25	0.0631215	0.0833333	0	7
Control	Control	Sand Island	2012-05-08	5	3	12	0.25			0.1	0.001575	0	7	6
Removal	Ap Only	Carysfort	2012-09-28	6	7	37	0.189189	0.936673	7.47326	0.0833333	0.00143895	0.333333
Removal	Ap Only	Elbow	2012-09-28	6	2	157	0.0127389	0.135019	14.8127	0	0	0.5
Removal	Ap Only	French	2012-09-28	6	4	55	0.0727273	0.41849	9.55818	0.1	0.00758099	0.8
Removal	Ap Only	KLDR	2012-09-28	6	0	18	0	0	0.75537	0	0	0.5
Removal	Ap Only	Molasses	2012-09-28	6	3	12	0.25	1.42475	2.10563	0.222222	0.00651693	0.111111
Removal	Ap Only	Sand Island	2012-09-28	6	6	37	0.162162	1.39948	4.2873	0.0833333	0.000384	0
Removal	All Hosts	Carysfort	2012-09-28	6	1	27	0.037037	0.343384	2.9122	0	0	0.583333
Removal	All Hosts	Elbow	2012-09-28	6	2	43	0.0465116	0.430842	4.64208	0	0	0.5
Removal	All Hosts	French	2012-09-28	6	2	43	0.0465116	1.16262	1.72026	0	0	0
Removal	All Hosts	KLDR	2012-09-28	6	0	18	0	0	0.217778	0	0	0.333333
Removal	All Hosts	Molasses	2012-09-28	6	1	66	0.0151515	0.263221	3.79909	0	0	0.2
Removal	All Hosts	Sand Island	2012-09-28	6	10	122	0.0819672	0.660045	15.1505	0.166667	0.0101105	0
Control	Control	Carysfort	2012-09-28	6	9	16	0.5625	19.7887	0.454804	0.285714	0.0158877	0.5
Control	Control	Elbow	2012-09-28	6	16	84	0.190476	5.21297	3.06927	0.3	0.0294748	0.3
Control	Control	French	2012-09-28	6	1	52	0.0192308	0.679139	1.47245	0	0	0.25
Control	Control	KLDR	2012-09-28	6	12	15	0.8	5.24716	2.28695	0.272727	0.0261579	0.363636
Control	Control	Molasses	2012-09-28	6	5	60	0.0833333	0.559444	8.93744	0.166667	0.00746704	0.25
Control	Control	Sand Island	2012-09-28	6	3	9	0.333333	3.19233	0.939752	0.222222	0.010091	0.111111
Removal	Ap Only	Carysfort	2013-02-10	7	10	22	0.454545			0.0833333	0.0144908	0
Removal	Ap Only	Elbow	2013-02-10	7	15	106	0.141509			0.0833333	0.001587	0.333333
Removal	Ap Only	French	2013-02-10	7	2	72	0.0277778			0	0	0
Removal	Ap Only	KLDR	2013-02-10	7	0	16	0			0	0	0.166667
Removal	Ap Only	Molasses	2013-02-10	7	4	10	0.4			0.222222	0.00128067	0
Removal	Ap Only	Sand Island	2013-02-10	7	4	26	0.153846			0	0	0.0833333
Removal	All Hosts	Carysfort	2013-02-10	7	4	14	0.285714			0	0	0
Removal	All Hosts	Elbow	2013-02-10	7	5	31	0.16129			0	0	0
Removal	All Hosts	French	2013-02-10	7	2	35	0.0571429			0	0	0
Removal	All Hosts	KLDR	2013-02-10	7	1	16	0.0625			0.0909091	0.00833681	0
Removal	All Hosts	Molasses	2013-02-10	7	3	43	0.0697674			0.0833333	0.000816667	0.0833333
Removal	All Hosts	Sand Island	2013-02-10	7	11	53	0.207547			0.333333	0.0483203	0.0833333
Control	Control	Carysfort	2013-02-10	7	7	12	0.583333			0.166667	0.0867226	0
Control	Control	Elbow	2013-02-10	7	24	33	0.727273			0.272727	0.0387445	0
Control	Control	French	2013-02-10	7	7	28	0.25			0.181818	0.12808	0.272727
Control	Control	KLDR	2013-02-10	7	11	12	0.916667			0.333333	0.0194359	0.222222
Control	Control	Molasses	2013-02-10	7	10	41	0.243902			0.166667	0.0264633	0.0833333
Control	Control	Sand Island	2013-02-10	7	1	9	0.111111			0.111111	0.0088	0
Removal	Ap Only	Carysfort	2013-05-28	8	13	22	0.590909			0.333333	0.0543052	0
Removal	Ap Only	Elbow	2013-05-28	8	5	88	0.0568182			0.166667	0.0634147	0.333333
Removal	Ap Only	French	2013-05-28	8	4	61	0.0655738			0.0833333	0.0146027	0.0833333
Removal	Ap Only	KLDR	2013-05-28	8	2	14	0.142857			0.0833333	0.033489	0
Removal	Ap Only	Molasses	2013-05-28	8	13	9	1.44444			0.333333	0.0186517	0
Removal	Ap Only	Sand Island	2013-05-28	8	7	30	0.233333			0.0833333	0.004116	0.0833333
Removal	All Hosts	Carysfort	2013-05-28	8	5	11	0.454545			0.125	0.0435005	0
Removal	All Hosts	Elbow	2013-05-28	8	3	25	0.12			0.0833333	0.00715408	0
Removal	All Hosts	French	2013-05-28	8	2	35	0.0571429			0	0	0
Removal	All Hosts	KLDR	2013-05-28	8	1	14	0.0714286			0.1	0.00119025	0
Removal	All Hosts	Molasses	2013-05-28	8	10	38	0.263158			0.166667	0.0371922	0
Removal	All Hosts	Sand Island	2013-05-28	8	18	37	0.486486			0.25	0.031983	0
Control	Control	Carysfort	2013-05-28	8	15	12	1.25			0.166667	0.110269	0.0833333
Control	Control	Elbow	2013-05-28	8	10	24	0.416667			0.1	0.00301156	0
Control	Control	French	2013-05-28	8	6	15	0.4			0.1	0.00408375	0
Control	Control	KLDR	2013-05-28	8	4	9	0.444444			0.222222	0.012179	0
Control	Control	Molasses	2013-05-28	8	17	27	0.62963			0.25	0.0530696	0
Control	Control	Sand Island	2013-05-28	8	3	9	0.333333			0.111111	0.00687244	0
Removal	Ap Only	Carysfort	2013-08-25	9	16	21	0.761905	1.91582	8.35151	0	0	0.25	4	6
Removal	Ap Only	Elbow	2013-08-25	9	19	76	0.25	1.28201	14.8204	0	0	0.25	0	1
Removal	Ap Only	French	2013-08-25	9	7	57	0.122807	0.669722	10.4521	0.0833333	0.0041568	0.333333	29	19
Removal	Ap Only	KLDR	2013-08-25	9	3	11	0.272727	4.57825	0.655273	0	0	0	9	5
Removal	Ap Only	Molasses	2013-08-25	9	20	15	1.33333	8.58602	2.32937	0.0909091	0.00453301	0.0909091	0	0
Removal	Ap Only	Sand Island	2013-08-25	9	17	21	0.809524	3.63241	4.68009	0	0	0	1	1
Removal	All Hosts	Carysfort	2013-08-25	9	6	13	0.461538	2.59338	2.31359	0	0	0.583333	34	3
Removal	All Hosts	Elbow	2013-08-25	9	9	31	0.290323	1.88731	4.7687	0.0833333	0.0130411	0.583333	3	1
Removal	All Hosts	French	2013-08-25	9	6	44	0.136364	2.84867	2.10625	0	0	0.0833333	21	5
Removal	All Hosts	KLDR	2013-08-25	9	1	15	0.0666667	5.80945	0.172133	0	0	0	0	2
Removal	All Hosts	Molasses	2013-08-25	9	9	40	0.225	2.27851	3.94996	0	0	0.333333	25	8
Removal	All Hosts	Sand Island	2013-08-25	9	39	51	0.764706	2.34247	16.6491	0	0	0.166667	4	1
Control	Control	Carysfort	2013-08-25	9	15	9	1.66667	190.725	0.0786474	0.142857	0.016996	0.428571	4	4
Control	Control	Elbow	2013-08-25	9	18	29	0.62069	5.2233	3.4461	0.272727	0.00824029	0.181818	6	4
Control	Control	French	2013-08-25	9	5	20	0.25	4.20844	1.18809	0.166667	0.0329733	0.166667	31	15
Control	Control	KLDR	2013-08-25	9	10	9	1.11111	3.98935	2.50667	0.333333	0.0662483	0.333333	10	6
Control	Control	Molasses	2013-08-25	9	21	31	0.677419	2.40207	8.74247	0.25	0.179736	0.0833333	8	6
Control	Control	Sand Island	2013-08-25	9	5	9	0.555556	4.21699	1.18568	0.111111	0.021175	0.111111	8	4

## Sheet: Snail size
Reef	Treatment	Survey	HostGroup	Snail Size	Gender
French	All Hosts	1	APAL	15
French	All Hosts	1	APAL	22.5
French	All Hosts	1	APAL	31
French	All Hosts	1	APAL	34.5
French	All Hosts	1	APAL	18
French	All Hosts	1	APAL	17
French	All Hosts	1	APAL	25.5
French	All Hosts	1	APAL	14
French	Ap Only	2	APAL	22
French	Ap Only	2	APAL	20
French	All Hosts	2	APAL	16
Molasses	All Hosts	2	APAL	19
Molasses	All Hosts	2	APAL	17
Molasses	All Hosts	2	APAL	21
Molasses	All Hosts	2	APAL	20
Molasses	All Hosts	1	Other	12
Molasses	All Hosts	2	APAL	22
Molasses	All Hosts	2	APAL	25
Molasses	All Hosts	2	Other	14
Molasses	All Hosts	1	Other	21
Molasses	All Hosts	1	Other	20
Molasses	All Hosts	1	Other	17
Molasses	All Hosts	1	Other	17
Sand Island	Ap Only	2	APAL	13
Sand Island	Ap Only	2	APAL	15
Sand Island	Ap Only	2	APAL	24
Sand Island	All Hosts	2	APAL	14
Sand Island	All Hosts	1	Other	12
Sand Island	All Hosts	1	Other	16
Sand Island	All Hosts	1	Other	13
Sand Island	All Hosts	1	Other	15
Sand Island	All Hosts	1	Other	15
Sand Island	All Hosts	1	Other	24
Sand Island	All Hosts	1	Other	16
Sand Island	All Hosts	1	Other	27
Sand Island	All Hosts	1	Other	19
Sand Island	All Hosts	2	APAL	14
Sand Island	All Hosts	2	APAL	14
Sand Island	All Hosts	1	APAL	15
Sand Island	All Hosts	1	APAL	32
Sand Island	All Hosts	1	APAL	12
Sand Island	All Hosts	1	APAL	18
Sand Island	All Hosts	1	APAL	13
Sand Island	All Hosts	1	APAL	11
Sand Island	All Hosts	2	APAL	15
Sand Island	All Hosts	2	APAL	19
Sand Island	All Hosts	1	APAL	47
Sand Island	All Hosts	1	APAL	24
Sand Island	All Hosts	1	APAL	21
Sand Island	All Hosts	1	APAL	18
Sand Island	All Hosts	1	APAL	24
Sand Island	All Hosts	1	APAL	12
Sand Island	All Hosts	1	APAL	39
Sand Island	All Hosts	1	APAL	28
Sand Island	All Hosts	1	APAL	29
French	Ap Only	1	APAL	37
French	Ap Only	1	APAL	27
French	Ap Only	1	APAL	22
French	Ap Only	1	APAL	25
French	Ap Only	1	APAL	29
French	Ap Only	1	APAL	16
French	Ap Only	1	APAL	31
French	Ap Only	1	APAL	40
French	Ap Only	1	APAL	24
French	Ap Only	1	APAL	28
French	Ap Only	1	APAL	22
French	Ap Only	1	APAL	36
French	Ap Only	1	APAL	19
French	All Hosts	1	Other	22
French	All Hosts	1	Other	23
French	All Hosts	1	Other	18
French	All Hosts	1	Other	19
French	All Hosts	1	Other	25
French	All Hosts	1	Other	17
French	All Hosts	1	Other	19
French	All Hosts	1	Other	18
French	All Hosts	1	Other	21
French	All Hosts	1	Other	21
French	All Hosts	1	Other	20
French	All Hosts	1	Other	22
French	All Hosts	1	Other	13
French	All Hosts	1	Other	21
French	All Hosts	1	Other	16
French	All Hosts	1	Other	23
French	All Hosts	1	Other	18
French	All Hosts	1	Other	18
French	All Hosts	1	Other	22
French	All Hosts	1	Other	13
French	All Hosts	1	Other	16
French	All Hosts	1	Other	17
French	All Hosts	1	Other	24
French	All Hosts	1	Other	18
French	All Hosts	1	Other	18
French	All Hosts	1	Other	20
French	All Hosts	1	Other	18
French	All Hosts	1	Other	18
French	All Hosts	1	Other	18
French	All Hosts	1	Other	22
French	All Hosts	1	Other	16
French	All Hosts	1	Other	22
French	All Hosts	1	Other	18
French	All Hosts	1	Other	31
French	All Hosts	1	Other	11
French	All Hosts	1	Other	13
French	All Hosts	1	Other	19
French	All Hosts	1	Other	12
French	All Hosts	1	Other	11
French	All Hosts	1	APAL	32
French	All Hosts	1	APAL	26
Molasses	All Hosts	1	Other	23
Molasses	All Hosts	1	Other	18
Molasses	All Hosts	1	Other	17
Molasses	All Hosts	1	Other	19
Molasses	All Hosts	1	Other	21
Molasses	All Hosts	1	Other	15
Molasses	All Hosts	1	Other	21
Molasses	All Hosts	1	Other	19
Molasses	All Hosts	1	Other	18
Molasses	All Hosts	1	Other	15
Molasses	All Hosts	1	Other	11
Molasses	All Hosts	1	Other	11
Molasses	All Hosts	1	Other	20
Molasses	All Hosts	1	APAL	35
Molasses	All Hosts	1	APAL	31
Molasses	All Hosts	1	APAL	27
Molasses	All Hosts	1	APAL	32
Molasses	All Hosts	1	APAL	24
Molasses	All Hosts	1	APAL	16
Molasses	All Hosts	1	APAL	17
Molasses	All Hosts	1	APAL	20
Molasses	All Hosts	1	APAL	26
Molasses	All Hosts	1	APAL	14
Molasses	All Hosts	1	APAL	30
Molasses	All Hosts	1	APAL	18
Molasses	All Hosts	1	APAL	22
Molasses	All Hosts	1	APAL	18
Molasses	All Hosts	1	APAL	30
Molasses	All Hosts	1	APAL	19
Molasses	All Hosts	1	APAL	25
Molasses	All Hosts	1	APAL	20
Molasses	All Hosts	1	APAL	21
Molasses	All Hosts	1	APAL	19
Molasses	All Hosts	1	APAL	29
Molasses	All Hosts	1	APAL	25
Molasses	All Hosts	1	APAL	27
Molasses	All Hosts	1	APAL	19
Molasses	All Hosts	1	APAL	29
Molasses	All Hosts	1	APAL	17
Molasses	All Hosts	1	APAL	39
Molasses	All Hosts	1	APAL	26
Molasses	All Hosts	1	APAL	32
Molasses	All Hosts	1	APAL	26
Molasses	All Hosts	1	APAL	26
Molasses	All Hosts	1	APAL	26
Molasses	All Hosts	1	APAL	24
Molasses	All Hosts	1	APAL	18
Molasses	All Hosts	1	APAL	25
Molasses	All Hosts	1	APAL	15
Molasses	All Hosts	1	APAL	26
Molasses	All Hosts	1	APAL	21
KLDR	Ap Only	1	APAL	21
KLDR	Ap Only	1	APAL	31
Carysfort	Ap Only	1	APAL	11
Carysfort	Ap Only	1	APAL	25
Carysfort	Ap Only	1	APAL	25
Carysfort	Ap Only	1	APAL	19
Carysfort	Ap Only	1	APAL	23
Carysfort	Ap Only	1	APAL	17
Carysfort	Ap Only	1	APAL	25
Carysfort	Ap Only	1	APAL	25
Carysfort	Ap Only	1	APAL	21
Carysfort	Ap Only	1	APAL	23
Carysfort	Ap Only	1	APAL	29
Carysfort	Ap Only	1	APAL	36
Carysfort	Ap Only	1	APAL	22
Carysfort	Ap Only	1	APAL	38
Carysfort	Ap Only	1	APAL	19
Carysfort	Ap Only	1	APAL	40
Carysfort	Ap Only	1	APAL	40
Carysfort	Ap Only	1	APAL	39
Carysfort	Ap Only	1	APAL	24
Carysfort	Ap Only	1	APAL	33
Carysfort	Ap Only	1	APAL	26
Carysfort	Ap Only	1	APAL	23
Carysfort	Ap Only	1	APAL	33
Carysfort	Ap Only	1	APAL	26
Carysfort	Ap Only	1	APAL	26
Carysfort	Ap Only	1	APAL	38
Carysfort	Ap Only	1	APAL	25
Carysfort	Ap Only	1	APAL	31
Carysfort	Ap Only	1	APAL	18
Carysfort	Ap Only	1	APAL	17
Carysfort	Ap Only	1	APAL	39
Carysfort	Ap Only	1	APAL	17
Carysfort	Ap Only	1	APAL	31
Carysfort	Ap Only	1	APAL	22
Carysfort	Ap Only	1	APAL	22
Carysfort	Ap Only	1	APAL	28
Carysfort	Ap Only	1	APAL	22
Carysfort	Ap Only	1	APAL	20
Carysfort	Ap Only	1	APAL	26
Carysfort	Ap Only	1	APAL	36
Carysfort	Ap Only	1	APAL	25
Carysfort	Ap Only	1	APAL	15
Carysfort	Ap Only	1	APAL	30
Carysfort	All Hosts	1	APAL	15
Carysfort	All Hosts	1	APAL	23
Carysfort	All Hosts	1	APAL	35
Carysfort	All Hosts	1	APAL	29
Carysfort	All Hosts	1	APAL	35
Carysfort	All Hosts	1	APAL	22
Carysfort	All Hosts	1	APAL	35
Carysfort	All Hosts	1	APAL	32
Carysfort	All Hosts	1	APAL	24
Carysfort	All Hosts	1	APAL	17
Carysfort	All Hosts	1	APAL	23
Carysfort	All Hosts	1	APAL	20
Carysfort	All Hosts	1	APAL	15
Carysfort	All Hosts	1	APAL	32
Carysfort	All Hosts	1	APAL	18
Carysfort	All Hosts	1	APAL	15
Carysfort	All Hosts	1	APAL	17
Carysfort	All Hosts	1	Other	18
Carysfort	All Hosts	1	Other	19
Carysfort	All Hosts	1	Other	24
Carysfort	All Hosts	1	Other	22
Carysfort	All Hosts	1	Other	14
Carysfort	All Hosts	1	Other	24
Carysfort	All Hosts	1	Other	18
Carysfort	All Hosts	1	Other	18
Carysfort	All Hosts	1	Other	20
Carysfort	All Hosts	1	Other	21
Carysfort	All Hosts	1	Other	20
Carysfort	All Hosts	1	Other	20
Carysfort	All Hosts	1	Other	19
Carysfort	All Hosts	1	Other	19
Carysfort	All Hosts	1	Other	15
Carysfort	All Hosts	1	Other	18
Carysfort	All Hosts	1	Other	19
Carysfort	All Hosts	1	Other	23
Carysfort	All Hosts	1	Other	23
Carysfort	All Hosts	1	Other	13
Carysfort	All Hosts	1	Other	18
Carysfort	All Hosts	1	Other	22
Carysfort	All Hosts	1	Other	22
Carysfort	All Hosts	1	Other	20
Carysfort	All Hosts	1	Other	19
Carysfort	All Hosts	1	Other	12
Carysfort	All Hosts	1	Other	22
Carysfort	All Hosts	1	Other	17
Carysfort	All Hosts	1	Other	16
Carysfort	All Hosts	1	Other	20
Carysfort	All Hosts	1	Other	20
Carysfort	All Hosts	1	Other	15
Carysfort	All Hosts	1	Other	21
Carysfort	All Hosts	1	Other	17
Carysfort	All Hosts	1	Other	14
Carysfort	All Hosts	1	Other	20
Carysfort	All Hosts	1	Other	22
Carysfort	All Hosts	1	Other	20
Carysfort	All Hosts	1	Other	18
Carysfort	All Hosts	1	Other	16
Carysfort	All Hosts	1	Other	19
Carysfort	All Hosts	1	Other	18
Carysfort	All Hosts	1	Other	17
Carysfort	All Hosts	1	Other	19
Carysfort	All Hosts	1	Other	20
Carysfort	All Hosts	1	Other	17
Carysfort	All Hosts	1	Other	20
Carysfort	All Hosts	1	Other	18
Carysfort	All Hosts	1	Other	14
Carysfort	All Hosts	1	Other	22
Carysfort	All Hosts	1	Other	20
Carysfort	All Hosts	1	Other	16
Carysfort	All Hosts	1	Other	16
Carysfort	All Hosts	1	Other	22
Carysfort	All Hosts	1	Other	21
Carysfort	All Hosts	1	Other	16
Carysfort	All Hosts	1	Other	17
Carysfort	All Hosts	1	Other	21
Carysfort	All Hosts	1	Other	18
Carysfort	All Hosts	1	Other	16
Carysfort	All Hosts	1	Other	17
Elbow	Ap Only	1	APAL	23
Elbow	Ap Only	1	APAL	25
Elbow	Ap Only	1	APAL	32
Elbow	Ap Only	1	APAL	14
Elbow	Ap Only	1	APAL	16
Elbow	Ap Only	1	APAL	17
Elbow	Ap Only	1	APAL	45
Elbow	Ap Only	1	APAL	24
Elbow	Ap Only	1	APAL	31
Elbow	Ap Only	1	APAL	22
Elbow	Ap Only	1	APAL	16
Elbow	Ap Only	1	APAL	23
Elbow	Ap Only	1	APAL	33
Elbow	Ap Only	1	APAL	20
Elbow	Ap Only	1	APAL	18
Elbow	Ap Only	1	APAL	14
Elbow	Ap Only	1	APAL	14
Elbow	Ap Only	1	APAL	21
Elbow	Ap Only	1	APAL	17
Elbow	Ap Only	1	APAL	25
Elbow	Ap Only	1	APAL	15
Elbow	Ap Only	1	APAL	32
Elbow	Ap Only	1	APAL	19
Elbow	Ap Only	1	APAL	26
Elbow	Ap Only	1	APAL	19
Elbow	Ap Only	1	APAL	15
Elbow	Ap Only	1	APAL	30
Elbow	All Hosts	1	Other	21
Elbow	All Hosts	1	Other	20
Elbow	All Hosts	1	Other	21
Elbow	All Hosts	1	Other	18
Elbow	All Hosts	1	Other	24
Elbow	All Hosts	1	Other	24
Elbow	All Hosts	1	Other	13
Elbow	All Hosts	1	Other	17
Elbow	All Hosts	1	Other	16
Elbow	All Hosts	1	Other	17
Elbow	All Hosts	1	APAL	36
Elbow	All Hosts	1	APAL	37
Elbow	All Hosts	1	APAL	22
Elbow	All Hosts	1	APAL	39
Elbow	All Hosts	1	APAL	34
Elbow	All Hosts	1	APAL	23
Elbow	All Hosts	1	APAL	39
Elbow	All Hosts	1	APAL	37
Elbow	All Hosts	1	APAL	30
Elbow	All Hosts	1	APAL	22
Elbow	All Hosts	1	APAL	42
Elbow	All Hosts	1	APAL	21
Elbow	All Hosts	1	APAL	29
Elbow	All Hosts	1	APAL	22
Elbow	All Hosts	1	APAL	24
Elbow	All Hosts	1	APAL	18
Elbow	All Hosts	1	APAL	18
Elbow	All Hosts	1	APAL	26
Elbow	All Hosts	1	APAL	41
Elbow	All Hosts	1	APAL	43
Sand Island	Ap Only	1	APAL	34
Sand Island	Ap Only	1	APAL	25
Sand Island	Ap Only	1	APAL	36
Sand Island	Ap Only	1	APAL	39
Sand Island	Ap Only	1	APAL	32
Sand Island	Ap Only	1	APAL	19
Sand Island	Ap Only	1	APAL	31
Sand Island	Ap Only	1	APAL	18
Sand Island	Ap Only	1	APAL	21
Sand Island	Ap Only	1	APAL	16
Sand Island	Ap Only	1	APAL	40
Sand Island	Ap Only	1	APAL	14
Sand Island	Ap Only	1	APAL	24
Sand Island	Ap Only	1	APAL	42
Sand Island	Ap Only	1	APAL	37
Sand Island	Ap Only	1	APAL	22
Sand Island	Ap Only	1	APAL	31
Sand Island	Ap Only	1	APAL	20
Sand Island	Ap Only	1	APAL	17
Sand Island	Ap Only	1	APAL	21
Sand Island	Ap Only	1	APAL	33
Sand Island	Ap Only	1	APAL	20
Sand Island	Ap Only	1	APAL	15
Sand Island	Ap Only	1	APAL	17
Sand Island	Ap Only	1	APAL	17
Sand Island	Ap Only	1	APAL	32
Sand Island	Ap Only	1	APAL	29
Sand Island	Ap Only	1	APAL	25
Sand Island	Ap Only	1	APAL	27
Sand Island	Ap Only	1	APAL	20
Sand Island	Ap Only	1	APAL	42
Sand Island	Ap Only	1	APAL	13
Sand Island	All Hosts	1	APAL	32
Sand Island	All Hosts	1	APAL	28
Sand Island	All Hosts	1	APAL	25
Sand Island	All Hosts	1	APAL	36
Sand Island	All Hosts	1	APAL	32
Sand Island	All Hosts	1	APAL	16
Sand Island	All Hosts	1	APAL	35
Sand Island	All Hosts	1	APAL	28
Sand Island	All Hosts	1	APAL	29
Sand Island	All Hosts	1	APAL	35
Sand Island	All Hosts	1	APAL	22
Sand Island	All Hosts	1	APAL	21
Sand Island	All Hosts	1	APAL	14
Sand Island	All Hosts	1	APAL	17
Sand Island	All Hosts	1	APAL	29
Sand Island	All Hosts	1	APAL	36
Sand Island	All Hosts	1	APAL	35
Sand Island	All Hosts	1	APAL	43
Sand Island	All Hosts	1	APAL	24
Sand Island	All Hosts	1	APAL	13
Sand Island	All Hosts	1	APAL	24
Sand Island	All Hosts	1	APAL	14
Sand Island	All Hosts	1	APAL	26
Sand Island	All Hosts	1	APAL	17
Sand Island	All Hosts	1	APAL	21
Sand Island	All Hosts	1	APAL	23
Sand Island	All Hosts	1	APAL	23
Sand Island	All Hosts	1	APAL	29
Sand Island	All Hosts	1	APAL	18
Sand Island	All Hosts	1	APAL	26
Sand Island	All Hosts	1	APAL	28
Sand Island	All Hosts	1	APAL	25
Sand Island	All Hosts	1	APAL	33
Sand Island	All Hosts	1	APAL	37
Sand Island	All Hosts	1	APAL	17
Sand Island	All Hosts	1	APAL	29
Sand Island	All Hosts	1	APAL	11
Sand Island	All Hosts	1	APAL	45
Sand Island	All Hosts	1	APAL	37
Sand Island	All Hosts	1	APAL	21
Sand Island	All Hosts	1	APAL	26
Sand Island	All Hosts	1	APAL	20
Sand Island	All Hosts	1	APAL	22
Sand Island	All Hosts	1	APAL	18
Sand Island	All Hosts	1	APAL	19
Molasses	Ap Only	1	APAL	23
Molasses	Ap Only	1	APAL	21
Molasses	Ap Only	1	APAL	25
Molasses	Ap Only	1	APAL	18
Molasses	Ap Only	1	APAL	19
Molasses	Ap Only	1	APAL	17
Molasses	Ap Only	1	APAL	17
Molasses	Ap Only	1	APAL	22
Molasses	Ap Only	1	APAL	21
Molasses	Ap Only	1	APAL	15
Molasses	Ap Only	1	APAL	17
Molasses	Ap Only	1	APAL	15
Molasses	Ap Only	1	APAL	18
KLDR	All Hosts	1	Other	25
KLDR	All Hosts	1	Other	30
KLDR	All Hosts	1	Other	23
KLDR	All Hosts	1	Other	25
KLDR	All Hosts	1	Other	22
KLDR	All Hosts	1	Other	10
KLDR	All Hosts	1	Other	23
KLDR	All Hosts	1	Other	21
KLDR	All Hosts	1	Other	18
KLDR	All Hosts	1	Other	16
KLDR	All Hosts	1	Other	17
KLDR	All Hosts	1	Other	23
KLDR	All Hosts	1	Other	21
KLDR	All Hosts	1	Other	20
KLDR	All Hosts	1	Other	19
KLDR	All Hosts	1	Other	24
KLDR	All Hosts	1	Other	17
KLDR	All Hosts	1	Other	20
KLDR	All Hosts	1	Other	17
KLDR	All Hosts	1	APAL	18
Carysfort	Ap Only	2	APAL	32
Carysfort	Ap Only	2	APAL	18
Carysfort	Ap Only	2	APAL	33
Carysfort	Ap Only	2	APAL	17
Carysfort	Ap Only	2	APAL	20
Carysfort	Ap Only	2	APAL	28
Carysfort	All Hosts	2	APAL	13
Carysfort	All Hosts	2	APAL	22
Elbow	Ap Only	2	APAL	20
Elbow	Ap Only	2	APAL	19
Elbow	Ap Only	2	APAL	21
Elbow	Ap Only	2	APAL	24
Elbow	Ap Only	2	APAL	34
Elbow	Ap Only	2	APAL	20
Elbow	Ap Only	2	APAL	34
Elbow	All Hosts	2	APAL	26
Elbow	All Hosts	2	APAL	13
Elbow	All Hosts	2	APAL	21
Elbow	All Hosts	2	APAL	18
Elbow	All Hosts	2	APAL	19
Elbow	All Hosts	2	APAL	15
Elbow	All Hosts	2	APAL	20
Elbow	All Hosts	2	APAL	14
Elbow	All Hosts	2	Other	23
Carysfort	All Hosts	3	APAL	17
Carysfort	All Hosts	3	APAL	26
Carysfort	All Hosts	3	APAL	20
Carysfort	All Hosts	3	APAL	15
Carysfort	All Hosts	3	APAL	18
Carysfort	All Hosts	3	APAL	22
Carysfort	All Hosts	3	APAL	11
Carysfort	All Hosts	3	APAL	11
Carysfort	All Hosts	3	APAL	23
Elbow	All Hosts	3	APAL	12
Elbow	All Hosts	3	APAL	13
Elbow	All Hosts	3	Other	25
Elbow	All Hosts	3	Other	13
Elbow	Ap Only	3	APAL	20
Elbow	Ap Only	3	APAL	14
Elbow	Ap Only	3	APAL	12
French	All Hosts	3	Other	16
French	All Hosts	3	Other	14
French	All Hosts	3	Other	12
French	All Hosts	3	Other	9
French	All Hosts	3	Other	7
KLDR	All Hosts	3	APAL	22
KLDR	All Hosts	3	APAL	20
KLDR	All Hosts	3	APAL	20
KLDR	All Hosts	3	APAL	26
KLDR	All Hosts	3	APAL	25
KLDR	Ap Only	3	APAL	14
Molasses	Ap Only	3	APAL	13.5
Molasses	Ap Only	3	APAL	21.5
Molasses	Ap Only	3	APAL	16
Molasses	All Hosts	3	APAL	14
Molasses	All Hosts	3	Other	19
Molasses	All Hosts	3	Other	15
Sand Island	Ap Only	3	APAL	12.5
Sand Island	All Hosts	3	APAL	18.5
Sand Island	All Hosts	3	APAL	13
Sand Island	All Hosts	3	APAL	19.5
Sand Island	All Hosts	3	APAL	17.5
Sand Island	All Hosts	3	APAL	13.5
Sand Island	All Hosts	3	APAL	14.5
Sand Island	All Hosts	3	APAL	12
Sand Island	All Hosts	3	APAL	30
Sand Island	All Hosts	3	APAL	14
Sand Island	All Hosts	3	APAL	18
Sand Island	All Hosts	3	APAL	17.5
Sand Island	All Hosts	3	APAL	21.5
Carysfort	Ap Only	3	APAL	15
Carysfort	Ap Only	3	APAL	17
Sand Island	Ap Only	4	APAL	18
Sand Island	Ap Only	4	APAL	22
Sand Island	Ap Only	4	APAL	19
Sand Island	Ap Only	4	APAL	16
Sand Island	Ap Only	4	APAL	14
Sand Island	All Hosts	4	APAL	20
Sand Island	All Hosts	4	APAL	13
Sand Island	All Hosts	4	APAL	10
Sand Island	All Hosts	4	Other	17
Elbow	Ap Only	4	APAL	17
Elbow	Ap Only	4	APAL	33
Elbow	Ap Only	4	APAL	21
Elbow	Ap Only	4	APAL	17
Elbow	Ap Only	4	APAL	23.5
Elbow	Ap Only	4	APAL	21
Elbow	All Hosts	4	APAL	16
Elbow	All Hosts	4	Other	13
Elbow	All Hosts	4	Other	16
KLDR	All Hosts	4	APAL	29.5
KLDR	All Hosts	4	APAL	19.5
Molasses	Ap Only	4	APAL	25
Molasses	All Hosts	4	APAL	19
Molasses	All Hosts	4	APAL	11
Molasses	All Hosts	4	APAL	32
Molasses	All Hosts	4	APAL	17
Molasses	All Hosts	4	APAL	20.5
Molasses	All Hosts	4	APAL	28
Molasses	All Hosts	4	Other	12
Molasses	All Hosts	4	Other	15
Molasses	All Hosts	4	Other	13
Molasses	All Hosts	4	Other	17
Molasses	All Hosts	4	Other	15
Molasses	All Hosts	4	Other	16
Molasses	All Hosts	4	Other	28
Molasses	All Hosts	4	Other	22
French	Ap Only	4	APAL	20
French	All Hosts	4	APAL	12
French	All Hosts	4	APAL	11.5
French	All Hosts	4	Other	13
Carysfort	Ap Only	4	APAL	19
Carysfort	Ap Only	4	APAL	19
Carysfort	Ap Only	4	APAL	16
Carysfort	Ap Only	4	APAL	18
Carysfort	Ap Only	4	APAL	30
Carysfort	Ap Only	4	APAL	28
Carysfort	Ap Only	4	APAL	24.5
Carysfort	Ap Only	4	APAL	30
Carysfort	Ap Only	4	APAL	24.5
Carysfort	Ap Only	4	APAL	19.5
Carysfort	Ap Only	4	APAL	24
Carysfort	Ap Only	4	APAL	22
Carysfort	Ap Only	4	APAL	16
Carysfort	Ap Only	4	APAL	21
Carysfort	Ap Only	4	APAL	20
Sand Island	All Hosts	9	Other	16.6	M
Sand Island	All Hosts	9	Other	13.5	M
Sand Island	All Hosts	9	Other	10.4	M
Sand Island	All Hosts	9	Other	27.5	F
KLDR	All Hosts	9	APAL	34.3	F
Sand Island	Ap Only	9	APAL	21.8	M
Sand Island	Ap Only	9	APAL	21.1	M
Sand Island	Ap Only	9	APAL	18.9	M
Sand Island	Ap Only	9	APAL	17.6	M
Sand Island	Ap Only	9	APAL	22.1	M
Sand Island	Ap Only	9	APAL	28.2	F
Sand Island	Ap Only	9	APAL	25.7	F
Sand Island	Ap Only	9	APAL	29.8	F
Sand Island	Ap Only	9	APAL	17.2	M
Sand Island	Ap Only	9	APAL	30.6	F
Sand Island	Ap Only	9	APAL	19.6	M
Sand Island	Ap Only	9	APAL	11.5	M
Sand Island	Ap Only	9	APAL	14.4	M
KLDR	Ap Only	9	APAL	28.9	F
KLDR	Ap Only	9	APAL	29.6	F
KLDR	Ap Only	9	APAL	32.5	F
Sand Island	All Hosts	9	APAL	30.9	F
Sand Island	All Hosts	9	APAL	17.2	M
Sand Island	All Hosts	9	APAL	32.4	F
Sand Island	All Hosts	9	APAL	29.6	F
Sand Island	All Hosts	9	APAL	24.8	M
Sand Island	All Hosts	9	APAL	27.7	M
Sand Island	All Hosts	9	APAL	33.1	F
Sand Island	All Hosts	9	APAL	23.5	M
Sand Island	All Hosts	9	APAL	23.1	M
Sand Island	All Hosts	9	APAL	25.2	F
Sand Island	All Hosts	9	APAL	30.8	F
Sand Island	All Hosts	9	APAL	23.1	M
Sand Island	All Hosts	9	APAL	22.3	M
Sand Island	All Hosts	9	APAL	28.5	M
Sand Island	All Hosts	9	APAL	25.3	M
Sand Island	All Hosts	9	APAL	16.8	M
Sand Island	All Hosts	9	APAL	29.4	F
Sand Island	All Hosts	9	APAL	22	M
Sand Island	All Hosts	9	APAL	20.4	M
Sand Island	All Hosts	9	APAL	20.5	M
Sand Island	All Hosts	9	APAL	18.6	M
Sand Island	All Hosts	9	APAL	20.2	M
Sand Island	All Hosts	9	APAL	16	M
Sand Island	All Hosts	9	APAL	22.4	M
Sand Island	All Hosts	9	APAL	22.3	M
Sand Island	All Hosts	9	APAL	19.7	M
Sand Island	All Hosts	9	APAL	20.7	M
Sand Island	All Hosts	9	APAL	22	M
Sand Island	All Hosts	9	APAL	16.4	M
Sand Island	All Hosts	9	APAL	17.2	M
Sand Island	All Hosts	9	APAL	16.3	M
Sand Island	All Hosts	9	APAL	18.2	M
Sand Island	All Hosts	9	APAL	8.2	M
Sand Island	All Hosts	9	APAL	10.5	M
Sand Island	All Hosts	9	APAL	8.8	M
Molasses	Ap Only	9	APAL	30.7	F
Molasses	Ap Only	9	APAL	23.2	F
Molasses	Ap Only	9	APAL	15.4	M
Molasses	Ap Only	9	APAL	17.1	M
Molasses	Ap Only	9	APAL	21.2	M
Molasses	Ap Only	9	APAL	27.5	F
Molasses	Ap Only	9	APAL	26	M
Molasses	Ap Only	9	APAL	17.7	M
Molasses	Ap Only	9	APAL	23.4	F
Molasses	Ap Only	9	APAL	20.4	M
Molasses	Ap Only	9	APAL	22.1	M
Molasses	Ap Only	9	APAL	25.8	F
Molasses	Ap Only	9	APAL	19.2	M
Molasses	Ap Only	9	APAL	22.2	M
Molasses	Ap Only	9	APAL	21.4	F
Molasses	Ap Only	9	APAL	23.7	M
Molasses	Ap Only	9	APAL	32.3	M
Molasses	Ap Only	9	APAL	15.5	M
Molasses	Ap Only	9	APAL	12.6	M
Molasses	All Hosts	9	Other	24.7	F
Molasses	All Hosts	9	APAL	25.6	F
Molasses	All Hosts	9	APAL	25	M
Molasses	All Hosts	9	APAL	31.8	F
Molasses	All Hosts	9	APAL	23.3	M
Molasses	All Hosts	9	APAL	29.8	F
Molasses	All Hosts	9	APAL	26.9	F
Molasses	All Hosts	9	APAL	20	M
Molasses	All Hosts	9	APAL	15.4	M
Molasses	All Hosts	9	APAL	15.3	M
Carysfort	Ap Only	9	APAL	31.3	F
Carysfort	Ap Only	9	APAL	25.9	M
Carysfort	Ap Only	9	APAL	22.8	F
Carysfort	Ap Only	9	APAL	26.3	F
Carysfort	Ap Only	9	APAL	25.3	F
Carysfort	Ap Only	9	APAL	22.1	M
Carysfort	Ap Only	9	APAL	31.2	F
Carysfort	Ap Only	9	APAL	23.2	F
Carysfort	Ap Only	9	APAL	21.9	M
Carysfort	Ap Only	9	APAL	30.7	F
Carysfort	Ap Only	9	APAL	29.9	F
Carysfort	Ap Only	9	APAL	22.7	M
Carysfort	Ap Only	9	APAL	17	M
Carysfort	Ap Only	9	APAL	18	M
Carysfort	Ap Only	9	APAL	16.7	M
Carysfort	Ap Only	9	APAL	18.5	M
Carysfort	All Hosts	9	APAL	24.1	F
Carysfort	All Hosts	9	APAL	22.4	M
Carysfort	All Hosts	9	APAL	18	M
Carysfort	All Hosts	9	APAL	18.3	M
Carysfort	All Hosts	9	APAL	21	M
Carysfort	All Hosts	9	APAL	14.4	M
Elbow	All Hosts	9	Other	23.5	F
Elbow	All Hosts	9	Other	19.1	F
Elbow	All Hosts	9	Other	18	M
Elbow	All Hosts	9	APAL	27.6	F
Elbow	All Hosts	9	APAL	23.9	F
Elbow	All Hosts	9	APAL	21.1	F
Elbow	All Hosts	9	APAL	21.5	M
Elbow	All Hosts	9	APAL	20.6	M
Elbow	All Hosts	9	APAL	14.2	M
Elbow	All Hosts	9	APAL	11.3	M
French	All Hosts	9	APAL	22.9	M
French	All Hosts	9	APAL	22.5	M
French	All Hosts	9	APAL	21.6	M
French	All Hosts	9	APAL	20.5	M
French	All Hosts	9	APAL	17.2	M
French	All Hosts	9	APAL	15.6	M
French	All Hosts	9	Other	20.4	F
French	All Hosts	9	Other	17.9	M
French	All Hosts	9	Other	16.8	M
French	All Hosts	9	Other	22	F
French	All Hosts	9	Other	19.9	F
French	All Hosts	9	Other	18.3	M
French	All Hosts	9	Other	20.5	F
French	All Hosts	9	Other	20.7	F
French	All Hosts	9	Other	19.6	M
French	All Hosts	9	Other	22.4	F
French	All Hosts	9	Other	18.8	M
French	All Hosts	9	Other	17	M
French	All Hosts	9	Other	19.9	M
French	All Hosts	9	Other	16.1	M
French	All Hosts	9	Other	13.9	M
French	All Hosts	9	Other	13.9	M
French	All Hosts	9	Other	14.3	M
French	All Hosts	9	Other	12.5	M
French	All Hosts	9	Other	9.5	M
French	All Hosts	9	Other	11	M
French	All Hosts	9	Other	6.6	M
French	Ap Only	9	APAL	34.6	F
French	Ap Only	9	APAL	27.9	M
French	Ap Only	9	APAL	23.3	M
French	Ap Only	9	APAL	26.4	M
French	Ap Only	9	APAL	19.4	M
Molasses	All Hosts	9	Other	19.8	F
Molasses	All Hosts	9	Other	16.3	M
Molasses	All Hosts	9	Other	14.8	M
Molasses	All Hosts	9	Other	18.6	M
Molasses	All Hosts	9	Other	15.3	M
Molasses	All Hosts	9	Other	15.2	M
Molasses	All Hosts	9	Other	17.4	M
Molasses	All Hosts	9	Other	16.6	M
Molasses	All Hosts	9	Other	13.7	M
Molasses	All Hosts	9	Other	16.6	M
Molasses	All Hosts	9	Other	15.9	F
Molasses	All Hosts	9	Other	12.8	M
Molasses	All Hosts	9	Other	10.5	M
Molasses	All Hosts	9	Other	10.2	M
Molasses	All Hosts	9	Other	9.1	M
Molasses	All Hosts	9	Other	7.3	M
Molasses	All Hosts	9	Other	12	M
Molasses	All Hosts	9	Other	11.4	M
Molasses	All Hosts	9	Other	11.2	M
Molasses	All Hosts	9	Other	9.8	M
Molasses	All Hosts	9	Other	7.9	M
Molasses	All Hosts	9	Other	9.6	M
Molasses	All Hosts	9	Other	8.2	M
Carysfort	All Hosts	9	Other	19.1	F
Carysfort	All Hosts	9	Other	17.4	M
Carysfort	All Hosts	9	Other	17.8	M
Carysfort	All Hosts	9	Other	11.1	M
Carysfort	All Hosts	9	Other	26.1	F
Carysfort	All Hosts	9	Other	23.8	F
Carysfort	All Hosts	9	Other	21.3	F
Carysfort	All Hosts	9	Other	23.4	F
Carysfort	All Hosts	9	Other	20.2	M
Carysfort	All Hosts	9	Other	22.2	F
Carysfort	All Hosts	9	Other	23.5	F
Carysfort	All Hosts	9	Other	21.2	F
Carysfort	All Hosts	9	Other	21	M
Carysfort	All Hosts	9	Other	22	M
Carysfort	All Hosts	9	Other	17.2	F
Carysfort	All Hosts	9	Other	17.6	F
Carysfort	All Hosts	9	Other	20.6	M
Carysfort	All Hosts	9	Other	21.3	F
Carysfort	All Hosts	9	Other	19.2	M
Carysfort	All Hosts	9	Other	17.7	M
Carysfort	All Hosts	9	Other	13.8	M
Carysfort	All Hosts	9	Other	20.5	F
Carysfort	All Hosts	9	Other	21.8	F
Carysfort	All Hosts	9	Other	24.2	F
Carysfort	All Hosts	9	Other	21.1	F
Carysfort	All Hosts	9	Other	17.9	M
Carysfort	All Hosts	9	Other	13.6	M
Carysfort	All Hosts	9	Other	17.9	M
Carysfort	All Hosts	9	Other	22.1	F
Carysfort	All Hosts	9	Other	22.6	F
Carysfort	All Hosts	9	Other	23	F
Carysfort	All Hosts	9	Other	19.9	M
Carysfort	All Hosts	9	Other	20.5	F
Carysfort	All Hosts	9	Other	18.6	M
Elbow	Ap Only	9	APAL	30.7	F
Elbow	Ap Only	9	APAL	25.6	F
Elbow	Ap Only	9	APAL	22.9	M
Elbow	Ap Only	9	APAL	11.7	M
Elbow	Ap Only	9	APAL	28.6	F
Elbow	Ap Only	9	APAL	27.2	M
Elbow	Ap Only	9	APAL	18.9	M
Elbow	Ap Only	9	APAL	31.9	F
Elbow	Ap Only	9	APAL	20.4	M
Elbow	Ap Only	9	APAL	16.9	M
Elbow	Ap Only	9	APAL	26.5	M
Elbow	Ap Only	9	APAL	18.5	M
Elbow	Ap Only	9	APAL	17	M
Elbow	Ap Only	9	APAL	21.3	M
Elbow	Ap Only	9	APAL	18.3	M
Elbow	Ap Only	9	APAL	18.1	M
KLDR	All Hosts	1	APAL	19
Molasses	Ap Only	9	APAL	24.7	F
Sand Island	Ap Only	9	APAL	17.5	M
Sand Island	Ap Only	9	APAL	11.9	M
Sand Island	Ap Only	9	APAL	17.4	M
Sand Island	Ap Only	9	APAL	13.6	M
Sand Island	All Hosts	9	APAL	24.2	F
Sand Island	All Hosts	9	APAL	12.7	M
Sand Island	All Hosts	9	APAL	18.6	M
Elbow	Ap Only	9	APAL	29.5	F
Elbow	Ap Only	9	APAL	21.7	M
Elbow	Ap Only	9	APAL	14.4	M
Elbow	All Hosts	9	APAL	27.2	F
Elbow	All Hosts	9	APAL	23.6	M
Sand Island	All Hosts	9	APAL	16.1	M
French	Ap Only	9	APAL	19.4	M
French	Ap Only	9	APAL	14.1	M
Molasses	All Hosts	9	Other	13	M
